# Supplementary material for: The cytoplasmic domain of neuropilin 1 is dispensable for angiogenesis, but promotes the spatial separation of retinal arteries and veins
Source: Oxford University Press journal article supplement (doi:10.1242/dev.070037), 2011-08-19
Supplement: dev070037tables1.pdf [file dev070037tables1.pdf]

**Table S1. Wild type, heterozygotes (*Nrp1*<sup>+/*cyto*Δ</sup>) and homozygotes (*Nrp1*<sup>*cyto*Δ/Δ</sup>) are present at the expected Mendelian ratio**

| Genotype                              | Total number of viable mice | Observed (%) | Predicted (%) |
|---------------------------------------|-----------------------------|--------------|---------------|
| <i>Nrp1</i> <sup>+/+</sup>            | 44                          | 26           | 25            |
| <i>Nrp1</i> <sup>+/<i>cyto</i>Δ</sup> | 76                          | 45           | 50            |
| <i>Nrp1</i> <sup><i>cyto</i>Δ/Δ</sup> | 49                          | 29           | 25            |
| Total                                 | 169                         | 100          | 100           |
